# Supplementary material for: Navigable maps of structural brain networks across species
Source: PubMed Central journal article supplement (PMC7018228; doi:10.1371/journal.pcbi.1007584), 2020-02-03
Supplement: pcbi.1007584.s001.pdf [file pcbi.1007584.s001.pdf]

| <b>Dataset</b> | <b>Pearson correlation coefficient</b> | <b>Spearman's rank correlation coefficient</b> |
|----------------|----------------------------------------|------------------------------------------------|
| Human1         | 0.910 (0.906, 0.914)                   | 0.847 (0.841, 0.852)                           |
| Human2         | 0.864 (0.857, 0.871)                   | 0.826 (0.820, 0.833)                           |
| Human3         | 0.494 (0.483, 0.504)                   | 0.501 (0.489, 0.513)                           |
| Human4         | 0.507 (0.499, 0.516)                   | 0.542 (0.532, 0.551)                           |
| Human5         | 0.478 (0.473, 0.483)                   | 0.527 (0.521, 0.533)                           |
