# Supplementary material for: Navigable maps of structural brain networks across species
Source: PubMed Central journal article supplement (PMC7018228; doi:10.1371/journal.pcbi.1007584), 2020-02-03
Supplement: pcbi.1007584.s002.pdf [file pcbi.1007584.s002.pdf]

| <b>Dataset</b> | <b>Pearson correlation coefficient</b> |
|----------------|----------------------------------------|
| Drosophila1    | 0.215                                  |
| Drosophila2    | 0.145                                  |
| ZebraFinch1    | 0.056                                  |
| CElegans       | 0.384                                  |
| Mouse1         | 0.167                                  |
| Mouse2         | 0.460                                  |
| Macaque1       | 0.501                                  |
| Macaque4       | 0.371                                  |
| Human1         | 0.042                                  |
| Human2         | 0.049                                  |
| Human3         | 0.170                                  |
| Human4         | 0.288                                  |
| Human5         | 0.192                                  |
| Human8         | 0.561                                  |
