# Supplementary material for: Navigable maps of structural brain networks across species
Source: PubMed Central journal article supplement (PMC7018228; doi:10.1371/journal.pcbi.1007584), 2020-02-03
Supplement: pcbi.1007584.s003.pdf [file pcbi.1007584.s003.pdf]

## OVERVIEW OF THE DIFFERENT DATASETS

| Name        | Node | Zone                   | Pos. | $N$  | $L$   | $\rho$ | $\langle k \rangle$ | $r$   | $\bar{c}$ | Ref.                   |
|-------------|------|------------------------|------|------|-------|--------|---------------------|-------|-----------|------------------------|
| C. Elegans  | cell | nervous system         | yes  | 279  | 2287  | 0.060  | 16.4                | -0.09 | 0.34      | [1, 2] <sup>1</sup>    |
| Cat1        | area | cortex                 | no   | 65   | 730   | 0.351  | 22.5                | -0.03 | 0.66      | [3, 4] <sup>2</sup>    |
| Cat2        | area | cortex and thalamus    | no   | 95   | 1170  | 0.262  | 24.6                | -0.09 | 0.62      | [5] <sup>3</sup>       |
| Cat3        | area | cortex                 | no   | 52   | 515   | 0.388  | 19.8                | -0.04 | 0.66      | [5] <sup>3</sup>       |
| Drosophila1 | cell | optic medulla          | yes  | 350  | 2887  | 0.047  | 16.5                | -0.02 | 0.24      | [6] <sup>4</sup>       |
| Drosophila2 | cell | optic medulla          | yes  | 1781 | 8911  | 0.006  | 10.0                | -0.09 | 0.26      | [6] <sup>5</sup>       |
| Macaque1    | area | cortex                 | yes  | 94   | 1515  | 0.347  | 32.2                | -0.15 | 0.77      | [7] <sup>6</sup>       |
| Macaque2    | area | cortex                 | no   | 71   | 438   | 0.176  | 12.3                | 0.09  | 0.50      | [8] <sup>7</sup>       |
| Macaque3    | area | cortex                 | no   | 242  | 3054  | 0.105  | 25.2                | -0.05 | 0.45      | [9] <sup>8</sup>       |
| Macaque4    | area | cortex                 | yes  | 29   | 322   | 0.793  | 22.2                | -0.15 | 0.87      | [10, 11] <sup>9</sup>  |
| Mouse1      | area | whole brain            | yes  | 213  | 2969  | 0.132  | 27.9                | -0.05 | 0.45      | [12] <sup>10</sup>     |
| Mouse2      | cell | retina                 | yes  | 916  | 77585 | 0.185  | 169.4               | -0.18 | 0.60      | [13] <sup>11</sup>     |
| Mouse3      | cell | retina                 | no   | 1076 | 90811 | 0.157  | 168.8               | -0.20 | 0.59      | [13] <sup>11</sup>     |
| Human1      | area | cortex (1 hemishpere)  | yes  | 493  | 7773  | 0.064  | 31.5                | 0.21  | 0.49      | [14, 15] <sup>12</sup> |
| Human2      | area | cortex (1 hemisphere)  | yes  | 496  | 8037  | 0.065  | 32.4                | 0.25  | 0.48      | [14, 15] <sup>12</sup> |
| Human3      | area | cortex (2 hemispheres) | yes  | 256  | 9103  | 0.279  | 71.1                | 0.09  | 0.68      | [16, 17] <sup>13</sup> |
| Human4      | area | cortex (2 hemispheres) | yes  | 360  | 12100 | 0.187  | 67.2                | 0.05  | 0.66      | [16, 17] <sup>13</sup> |
| Human5      | area | cortex (2 hemispheres) | yes  | 1024 | 36553 | 0.070  | 71.4                | 0.09  | 0.60      | [16, 17] <sup>13</sup> |
| Human6      | area | whole brain            | no   | 110  | 966   | 0.161  | 17.6                | 0.20  | 0.61      | [18] <sup>14</sup>     |
| Human7      | area | whole brain            | no   | 116  | 1165  | 0.175  | 20.1                | 0.27  | 0.63      | [18] <sup>15</sup>     |
| Human8      | area | whole brain            | yes  | 246  | 11060 | 0.367  | 89.9                | -0.01 | 0.69      | [19] <sup>16</sup>     |
| Rat1        | area | nervous system         | no   | 503  | 23030 | 0.182  | 91.6                | -0.73 | 0.89      | [20] <sup>17</sup>     |
| Rat2        | area | nervous system         | no   | 502  | 24647 | 0.196  | 98.2                | -0.74 | 0.89      | [20] <sup>18</sup>     |
| Rat2        | area | nervous system         | no   | 493  | 25979 | 0.214  | 105.4               | -0.70 | 0.88      | [20] <sup>19</sup>     |
| ZebraFinch1 | cell | basal-ganglia (Area X) | yes  | 582  | 2210  | 0.013  | 7.6                 | -0.16 | 0.04      | [21] <sup>20</sup>     |
| ZebraFinch2 | cell | basal-ganglia (Area X) | no   | 610  | 15342 | 0.083  | 50.3                | -0.26 | 0.11      | [21] <sup>21</sup>     |

TABLE I. Overview of the different datasets. For each connectome, the definition of nodes, the zone of the brain covered as well as whether geometrical information (i.e., positions) is available is indicated. The number of nodes ( $N$ ), the number of links ( $L$ ), the density of links ( $\rho = 2L/N(N-1)$ ), its average degree ( $\langle k \rangle = 2L/N$ ), the assortativity coefficient ( $r$ ) and the average local clustering coefficient ( $\bar{c}$ ).

### Table footnotes

1. The 3D positions were downloaded from Yong-Yeol Ahn's professional website (<http://yongyeol.com/data/celegans.net>) and the connectivity data were downloaded from <http://www.wormatlas.org/images/NeuronConnect.xls>.
2. Downloaded from the NeuroData's Graph DataBase (<https://neurodata.io/project/connectomes>): [https://s3.amazonaws.com/connectome-graphs/cat/mixed.species.brain\\_1.graphml](https://s3.amazonaws.com/connectome-graphs/cat/mixed.species.brain_1.graphml).
3. Dataset is hosted on the Brain Connectivity Toolbox website (<https://sites.google.com/site/bctnet/datasets>): <https://sites.google.com/site/bctnet/Home/functions/cat.mat>.
4. Extracted from Supplementary Table 1 of Ref. [6].
5. Downloaded from the NeuroData's Graph DataBase (<https://neurodata.io/project/connectomes>): [https://s3.amazonaws.com/connectome-graphs/fly/drosophila\\_medulla\\_1.graphml](https://s3.amazonaws.com/connectome-graphs/fly/drosophila_medulla_1.graphml).

6. Downloaded from Dynamic Connectome Lab website (<https://www.dynamic-connectome.org/>): <https://www.dynamic-connectome.org/pubs/suppl/mac95.mat>.
7. Downloaded from the Brain Connectivity Toolbox website (<https://sites.google.com/site/bctnet/datasets>): <https://sites.google.com/site/bctnet/Home/functions/macaque71.mat>.
8. Downloaded from the NeuroData's Graph DataBase (<https://neurodata.io/project/connectomes>): [https://s3.amazonaws.com/connectome-graphs/macaque/rhesus\\_brain\\_1.graphml](https://s3.amazonaws.com/connectome-graphs/macaque/rhesus_brain_1.graphml).
9. Based on information provided by the authors of Ref. [16], the connectivity data were extracted from the supplementary data of Ref. [11] (can be downloaded in xls format from [http://core-nets.org/download/Cercor\\_2012%20Table.xls](http://core-nets.org/download/Cercor_2012%20Table.xls)) and the distances published alongside Ref. [10] (can be downloaded in xls format from <http://core-nets.org/download/PNAS.2013.Distance.Matrix.xlsx>).
10. The distances were extracted from Supplementary Table 4 from Ref. [12] and the connectivity data were kindly provided by the authors of Ref. [12].
11. Downloaded from the NeuroData's Graph DataBase (<https://neurodata.io/project/connectomes>): [https://s3.amazonaws.com/connectome-graphs/mouse/mouse\\_retina\\_1.graphml](https://s3.amazonaws.com/connectome-graphs/mouse/mouse_retina_1.graphml). Mouse2 consists in the subset of Mouse3 for which spatial coordinates of the nodes were provided.
12. Downloaded from <https://ndownloader.figshare.com/files/10446582>. Human1 and Human2 correspond to the left and right hemispheres, respectively.
13. Dataset was kindly provided by the authors of Ref. [16].
14. Downloaded from [http://openconnecto.me/mrdata/share/dti/ndmg\\_v0011/NKIENH/AAL/NKIENH\\_0197456\\_1\\_DTLAAL.graphml](http://openconnecto.me/mrdata/share/dti/ndmg_v0011/NKIENH/AAL/NKIENH_0197456_1_DTLAAL.graphml).
15. Downloaded from [http://openconnecto.me/mrdata/share/dti/ndmg\\_v0011/NKIENH/HarvardOxford/NKIENH\\_0198051\\_1\\_DTLHarvardOxford.graphml](http://openconnecto.me/mrdata/share/dti/ndmg_v0011/NKIENH/HarvardOxford/NKIENH_0198051_1_DTLHarvardOxford.graphml).
16. Extracted from files `BNA_matrix_binary_246x246.csv`, `BNA_subregions.xlsx` and `subregion_func_network.Yeo.csv` downloaded from <http://atlas.brainnetome.org/download.html>.
17. Downloaded from the NeuroData's Graph DataBase (<https://neurodata.io/project/connectomes>): [https://s3.amazonaws.com/connectome-graphs/rat/rattus.norvegicus\\_brain\\_1.graphml](https://s3.amazonaws.com/connectome-graphs/rat/rattus.norvegicus_brain_1.graphml).
18. Downloaded from the NeuroData's Graph DataBase (<https://neurodata.io/project/connectomes>): [https://s3.amazonaws.com/connectome-graphs/rat/rattus.norvegicus\\_brain\\_2.graphml](https://s3.amazonaws.com/connectome-graphs/rat/rattus.norvegicus_brain_2.graphml).
19. Downloaded from the NeuroData's Graph DataBase (<https://neurodata.io/project/connectomes>): [https://s3.amazonaws.com/connectome-graphs/rat/rattus.norvegicus\\_brain\\_3.graphml](https://s3.amazonaws.com/connectome-graphs/rat/rattus.norvegicus_brain_3.graphml).
20. Dataset was kindly provided by the authors of Ref. [21].
21. Connectivity data were extracted from Supplementary Figure 7 of Ref. [21] (an excel file is provided on the corresponding Nature Methods page).

- 
- [1] Y.-Y. Ahn, H. Jeong, and B. J. Kim, "Wiring cost in the organization of a biological neuronal network," *Physica A* **367**, 531–537 (2006).
  - [2] L. R. Varshney, B. L. Chen, E. Paniagua, D. H. Hall, and D. B. Chklovskii, "Structural Properties of the Caenorhabditis elegans Neuronal Network," *PLoS Comput. Biol.* **7**, e1001066 (2011).
  - [3] J. W. Scannell, C. Blakemore, and M. P. Young, "Analysis of connectivity in the cat cerebral cortex," *J. Neurosci.* **15**, 1463–83 (1995).
  - [4] M. A. de Reus and M. P. van den Heuvel, "Rich Club Organization and Intermodule Communication in the Cat Connectome," *J. Neurosci.* **33**, 12929–12939 (2013).
  - [5] J. W. Scannell, "The Connectional Organization of the Cortico-thalamic System of the Cat," *Cereb. Cortex* **9**, 277–299 (1999).
  - [6] S.-Y. Takemura, A. Bharioke, Z. Lu, A. Nern, S. Vitaladevuni, P. K. Rivlin, W. T. Katz, D. J. Olbris, S. M. Plaza, P. Winston, T. Zhao, J. A. Horne, R. D. Fetter, S. Takemura, K. Blazek, L.-A. Chang, O. Ogundeyi, M. A. Saunders, V. Shapiro, C. Sigmund, G. M. Rubin, L. K. Scheffer, I. A. Meinertzhagen, and D. B. Chklovskii, "A visual motion detection circuit suggested by Drosophila connectomics," *Nature* **500**, 175–181 (2013).
  - [7] M. Kaiser and C. C. Hilgetag, "Nonoptimal Component Placement, but Short Processing Paths, due to Long-Distance Projections in Neural Systems," *PLoS Comput. Biol.* **2**, e95 (2006).

- [8] M. P. Young, “The Organization of Neural Systems in the Primate Cerebral Cortex,” *Proc. R. Soc. B* **252**, 13–18 (1993).
- [9] L. Harriger, M. P. van den Heuvel, and O. Sporns, “Rich Club Organization of Macaque Cerebral Cortex and Its Role in Network Communication,” *PLoS One* **7**, e46497 (2012).
- [10] N. T. Markov, M. Ercsey-Ravasz, C. Lamy, A. R. Ribeiro Gomes, L. Magrou, P. Misery, P. Giroud, P. Barone, C. Dehay, Z. Toroczkai, K. Knoblauch, D. C. Van Essen, and H. Kennedy, “The role of long-range connections on the specificity of the macaque interareal cortical network,” *Proc. Natl. Acad. Sci. USA* **110**, 5187–5192 (2013).
- [11] N. T. Markov, M. M. Ercsey-Ravasz, A. R. Ribeiro Gomes, C. Lamy, L. Magrou, J. Vezoli, P. Misery, A. Falchier, R. Quilodran, M. A. Gariel, J. Sallet, R. Gamanut, C. Huissoud, S. Clavagnier, P. Giroud, D. Sappey-Marini er, P. Barone, C. Dehay, Z. Toroczkai, K. Knoblauch, D. C. Van Essen, and H. Kennedy, “A Weighted and Directed Interareal Connectivity Matrix for Macaque Cerebral Cortex,” *Cereb. Cortex* **24**, 17–36 (2014).
- [12] S. W. Oh, J. A. Harris, L. Ng, B. Winslow, N. Cain, S. Mihalas, Q. Wang, C. Lau, L. Kuan, A.M. Henry, M. T. Mortrud, B. Ouellette, T. N. Nguyen, S. A. Sorensen, C. R. Slaughterbeck, W. Wakeman, Y. Li, D. Feng, A. Ho, E. Nicholas, K. E. Hirokawa, P. Bohn, K. M. Joines, H. Peng, M. J. Hawrylycz, J. W. Phillips, J. G. Hohmann, P. Wohnoutka, C. R. Gerfen, C. Koch, A. Bernard, C. Dang, A. R. Jones, and H. Zeng, “A mesoscale connectome of the mouse brain,” *Nature* **508**, 207–214 (2014).
- [13] M. Helmstaedter, Kevin L. Briggman, Srinivas C. Turaga, V. Jain, H. S. Seung, and Winfried Denk, “Connectomic reconstruction of the inner plexiform layer in the mouse retina,” *Nature* **500**, 168–174 (2013).
- [14] A. Avena-Koenigsberger, J. Goni, R. F. Betzel, M. P. van den Heuvel, A. Griffa, P. Hagmann, J.-P. Thiran, and O. Sporns, “Using Pareto optimality to explore the topology and dynamics of the human connectome,” *Philos. Trans. R. Soc. B Biol. Sci.* **369**, 20130530 (2014).
- [15] P. Hagmann, L. Cammoun, X. Gigandet, R. Meuli, C. J. Honey, V. J. Wedeen, and O. Sporns, “Mapping the Structural Core of Human Cerebral Cortex,” *PLoS Biol.* **6**, e159 (2008).
- [16] C. Seguin, M. P. van den Heuvel, and A. Zalesky, “Navigation of brain networks.” *Proc. Natl. Acad. Sci. U. S. A.* **115**, 6297–6302 (2018).
- [17] D.C. Van Essen, K. Ugurbil, E. Auerbach, D. Barch, T.E.J. Behrens, R. Bucholz, A. Chang, L. Chen, M. Corbetta, S.W. Curtiss, S. Della Penna, D. Feinberg, M.F. Glasser, N. Harel, A.C. Heath, L. Larson-Prior, D. Marcus, G. Michalareas, S. Moeller, R. Oostenveld, S.E. Petersen, F. Prior, B.L. Schlaggar, S.M. Smith, A.Z. Snyder, J. Xu, and E. Yacoub, “The Human Connectome Project: A data acquisition perspective,” *NeuroImage* **62**, 2222–2231 (2012).
- [18] W. R. Gray Roncal, Z. H. Koterba, D. Mhembere, D. M. Kleissas, J. T. Vogelstein, R. Burns, A. R. Bowles, D. K. Donavos, S. Ryman, R. E. Jung, L. Wu, V. Calhoun, and R. J. Vogelstein, “MIGRAINE: MRI Graph Reliability Analysis and Inference for Connectomics,” in *2013 IEEE Glob. Conf. Signal Inf. Process.* (IEEE, 2013) pp. 313–316.
- [19] Lingzhong Fan, Hai Li, Junjie Zhuo, Yu Zhang, Jiaojian Wang, Liangfu Chen, Zhengyi Yang, Congying Chu, Sangma Xie, Angela R. Laird, Peter T. Fox, Simon B. Eickhoff, Chunshui Yu, and Tianzi Jiang, “The human brainnetome atlas: A new brain atlas based on connectional architecture,” *Cerebral Cortex* **26**, 3508–3526 (2016).
- [20] M. Bota and L. W. Swanson, “Online workbenches for neural network connections,” *J. Comp. Neurol.* **500**, 807–814 (2007).
- [21] S. N. Dorkenwald, P. J. Schubert, M. F. Killinger, G. Urban, S. Mikula, F. Svara, and J. Kornfeld, “Automated synaptic connectivity inference for volume electron microscopy,” *Nat. Methods* **14**, 435–442 (2017).
