# Supplementary material for: Navigable maps of structural brain networks across species
Source: PubMed Central journal article supplement (PMC7018228; doi:10.1371/journal.pcbi.1007584), 2020-02-03
Supplement: pcbi.1007584.s005.pdf [file pcbi.1007584.s005.pdf]

## CRITICAL GAP METHOD

The critical gap method (CGM) is a general technique that identifies non-overlapping communities in geometrically embedded networks based on the distances between nodes [1, 2]. In the case of hyperbolic embeddings, it first assigns each node to its own community, and then aggregates pairs of angularly consecutive nodes in a same community if their separation is smaller than a critical angular distance,  $\Delta\theta_c$ . Note that the critical gap only defines the *boundaries* of the communities, meaning that only angularly consecutive nodes need to be separated by less than  $\Delta\theta_c$  to be part of a same community. In other words, three angularly consecutive nodes A, B and C, for which  $\theta_A < \theta_B < \theta_C$ , will be in the same community if  $\Delta\theta_{AB} < \Delta\theta_c$  and  $\Delta\theta_{BC} < \Delta\theta_c$ , independently of the value of  $\Delta\theta_{AC}$  which can be larger than  $\Delta\theta_c$ . Note that increasing  $\Delta\theta_c$  from 0 to  $2\pi$  generates a set of  $N$  unique partitions of non-overlapping communities, where  $N$  is the number of nodes, and that we selected the partitions with the highest modularity [3].

- 
- [1] M. Á. Serrano, M. Boguñá, and F. Sagués, “Uncovering the hidden geometry behind metabolic networks,” *Mol. Biosyst.* **8**, 843–850 (2012).
  - [2] G. García-Pérez, M. Boguñá, A. Allard, and M. Á. Serrano, “The hidden hyperbolic geometry of international trade: World Trade Atlas 1870-2013,” *Sci. Rep.* **6**, 33441 (2016).
  - [3] M. E. J. Newman and M. Girvan, “Finding and evaluating community structure in networks,” *Phys. Rev. E* **69**, 026113 (2004).
